# Supplementary material for: Basic Health Service Delivery to Vulnerable Populations in Post-Conflict Eastern Congo: Asset Mapping
Source: MDPI journal article supplement (doi:10.3390/healthcare11202778), 2023-10-20
Supplement: s1 [file s1]

Supplementary Table S1: Asset map resources sheet

| Category of Assets                                                  | Abbreviations           | Geographic Location                    | Resources                                                                                                                                                      | Collaboration Goals                                                                                          | Organizational Benefit                                                                                                                                                                  |
|---------------------------------------------------------------------|-------------------------|----------------------------------------|----------------------------------------------------------------------------------------------------------------------------------------------------------------|--------------------------------------------------------------------------------------------------------------|-----------------------------------------------------------------------------------------------------------------------------------------------------------------------------------------|
|                                                                     | <i>Locally known as</i> | <i>Site in eastern Congo</i>           | <i>What do they offer?</i>                                                                                                                                     | <i>What can you achieve together?</i>                                                                        | <i>How can each group benefit?</i>                                                                                                                                                      |
| Local associations                                                  |                         |                                        |                                                                                                                                                                |                                                                                                              |                                                                                                                                                                                         |
| Baraza la Wazee                                                     | BARWI                   | North Kivu                             | An interethnic organization, an influential partner for the response                                                                                           | Management of intercommunity conflicts                                                                       | Reduction in atrocities between communities                                                                                                                                             |
| Youth Counsel                                                       |                         | South Kivu, North Kivu, Ituri Province | Protection, education, supervision of youth, and their effective participation in the process of national reconstruction                                       | Promotion of economic development and preservation of Congolese cultural values                              | Collaboration, friendship, and fraternity with organizations working on youth issues<br>Representation of youth movements                                                               |
| Mutuelles de Solidarité                                             | MUSO                    | North Kivu                             | Community development, health structures, schools, education                                                                                                   | Aimed at vulnerable populations in rural areas who do not have access to traditional bank credit             | Brings together residents who know and trust each other and decide to jointly solve their problems by financing their project                                                           |
| National poll on perceptions of poverty by the populations of Congo | SOPPOC                  | North Kivu                             | Enough food, adequate clothing, shelter, and medical care                                                                                                      | Identification of basic needs                                                                                | Availability of resources addressing basic needs                                                                                                                                        |
| Association pour la promotion de l'entreprenariat féminin           | APEF                    | South Kivu                             | Emancipation of women and the redefinition of their place in society                                                                                           | Strengthen the economic activities and social power of women micro-entrepreneurs as well as rural households | Supports low-income women working in the informal sector so that they can increase their livelihoods and improve their economic and social position                                     |
| Conseil des Organisations Féminines Agissant en Synergie            | COFAS                   | South Kivu                             | Gender-based violence legal services, health, housing rights and informal settlements, labor and employment, livelihoods, right to information, women's rights | Effective participation of women in the development of South Kivu                                            | Advocacy for gender issues, fighting sexual violence, poverty reduction, legal empowerment, community and reproductive health                                                           |
| Réseau des Femmes pour le Développement Associatif                  | RFDA                    | South Kivu                             | Training of women in human rights, supporting women who are victims of violence                                                                                | Identification of victims of sexual violence, training of social workers, social, medical, and legal support | Provides care for 800 women victims of sexual violence in women's houses<br>The network also informs men about women's rights and organizes training on gender, peace, and development. |
| Centre d'encadrement et d'aide promotionnelle                       | CEDAP                   | South Kivu                             | Promotes the development of communities facing socio-economic and structural vulnerabilities, conflicts, and inter-community and identity tensions             | Promotion of peace and sustainable community development                                                     | Placing the individual at the center of all actions                                                                                                                                     |
| Association des Menuiseries de Kihumba                              | AMEKI                   | South Kivu, North Kivu                 | Timber trade and poverty reduction                                                                                                                             | Poverty alleviation                                                                                          | Fair commercial forestry                                                                                                                                                                |
| Association des Jeunes pour le Développement intégral               | AJVDI                   | North Kivu                             | Advocacy, conflict, education, environment, food security, health, poverty reduction, youth                                                                    | Inventory of conflict situations, peaceful conflict resolution, and the promotion of peace                   | Sharing experiences on the culture of peace                                                                                                                                             |
| Mining Mineral Resources                                            | MMR                     | North Kivu                             | Availability of alternative minerals such as gold or diamonds                                                                                                  | Buying minerals from different artisanal mining sites                                                        | Availability of canteens where locally produced                                                                                                                                         |

|                                                                      |         |                                        |                                                                                                  |                                                                                                                               |                                                                                                                                         |
|----------------------------------------------------------------------|---------|----------------------------------------|--------------------------------------------------------------------------------------------------|-------------------------------------------------------------------------------------------------------------------------------|-----------------------------------------------------------------------------------------------------------------------------------------|
|                                                                      |         |                                        |                                                                                                  |                                                                                                                               | food is available for the miners                                                                                                        |
| Association Rurale des Agriculteurs-Eleveurs de Kiluku               | AREAKi  | North Kivu                             | Integration of North Kivu into this vision by capitalizing on its economic and human potentials  | Achievement of food security by improving local food production                                                               | Reduced poverty of rural populations                                                                                                    |
| Union des Agriculteurs et Eleveurs pour le développement de Kirotshe | UADKi   | North Kivu                             | Capacity-building and institutional support to members, provision of economic services           | Support for community and family agro-pastoral production                                                                     | An economically strong rural population thanks to agro-pastoral activity and the marketing of agricultural and agro-industrial products |
| Youth Learning Centre                                                | AFIDI   | North Kivu                             | Civic and social organizations                                                                   | Creating employment opportunities for youth                                                                                   | Access to education for children                                                                                                        |
| Vision d'Appui aux enfants délaissés et orphelins                    | VAEDO   | North Kivu                             | Health education, water and sanitation, community recovery, and food security                    | Orphan care                                                                                                                   | Access to school for orphans                                                                                                            |
| Women's Initiative for Integral Development                          | IFEDI   | North Kivu                             | Works with "taxi bikers" in Goma                                                                 | Awareness sessions on violence against women and HIV prevention                                                               | By far the most convenient means of transportation (approximately 5,000 throughout the city)                                            |
| Espérance après violence et abandon                                  | EVA     | North Kivu                             | Offers advice and comfort to victims                                                             | To set up exchange platforms in the fight against AIDS and intrafamily violence against women                                 | Support for civil society actors is strengthened.                                                                                       |
| Groupe d'Hommes Voués au Développement                               | GHOVODI | North Kivu                             | Listening houses in which the association's 39 advisers, all volunteers, try to reduce suffering | Improvement in the social and health living conditions of the populations affected by the war in eastern DRC                  | Existing community fields, where women work together to avoid being isolated and raped on their way to the field                        |
| Associations Villageoises d'Epargne et Crédits                       | AVEC    | South Kivu, North Kivu, Ituri Province | Peacebuilding activities                                                                         | Resilience in the face of risks and unforeseen events, possibility of launching or consolidating income-generating activities | Educating the population on peacebuilding by setting up peace-generating projects such as village savings and credit associations       |
| Association des femmes commerçantes et navigantes                    | AFCONA  | South Kivu, North Kivu                 | Unity and solidarity between the organizations and their affiliates                              | To represent the interests of a rather wealthy class of female operators in alliance with smaller cloth traders               | More localized or sector-specific organizations                                                                                         |
| Forum SIDA                                                           | FOSI    | North Kivu, Ituri Province             | Community-based organizations fighting HIV/AIDS and sexual and gender-based violence             | Facilitates LGBTQ groups and sex workers to meet on its premises                                                              | Raising awareness about HIV/AIDS                                                                                                        |
| Associations Basées sur les Violences                                | ABV     | North Kivu                             | Psychosocial support and legal advice to confront the perpetrators of violence                   | Advocate for the protection of civilians against human rights abuses and gender-based violence                                | Briefing notes to report gender-based violence are produced.                                                                            |
| Bureau Central de la Zone de Santé                                   | BCZS    | South Kivu, North Kivu, Ituri Province | Implements the primary healthcare strategy                                                       | To set up a referral system with community healthcare providers                                                               | Availability of the peripheral level, including health posts, health centers, and hospitals of reference                                |
| Gender and Development in Practice                                   | GADIP   | South Kivu                             | A network for feminists within academia and civil society                                        | To enhance women's power, economic equality, and peace                                                                        | Interested and engaged in mutual knowledge and best practice exchange                                                                   |
| Precision Agriculture for Development                                | PAD     | South Kivu                             | Personalized agricultural advice                                                                 | To support smallholder farmers in developing countries                                                                        | Providing customized information and services that increase productivity, profitability, and                                            |

|                                                                              |                  |                                        |                                                                                                                                                                                       |                                                                                                               |                                                                                                                            |
|------------------------------------------------------------------------------|------------------|----------------------------------------|---------------------------------------------------------------------------------------------------------------------------------------------------------------------------------------|---------------------------------------------------------------------------------------------------------------|----------------------------------------------------------------------------------------------------------------------------|
|                                                                              |                  |                                        |                                                                                                                                                                                       |                                                                                                               | environmental sustainability                                                                                               |
| Action pour la Promotion et la Défense des Droits des Personnes Défavorisées | APPRODEPED       | South Kivu                             | Justice and human rights                                                                                                                                                              | To serve all disadvantaged people without distinction of race, sex, ethnicity, or religious belief            | Justice and human rights                                                                                                   |
| “Let’s unite” in Swahili                                                     | Tuungane         | South Kivu                             | Community-driven reconstruction program                                                                                                                                               | To support economic recovery and to improve the quality of local governance and social cohesion               |                                                                                                                            |
| Parlement des Jeunes                                                         |                  | South Kivu, North Kivu, Ituri Province | Made up of young leaders of organizations, associations and movements, religious denominations, and universities.                                                                     | Building a universe of integrity in favor of a resilient generation                                           | Economic and citizen empowerment                                                                                           |
| Women together or Women for Development                                      | Mamans Majambere | South Kivu                             | Meeting rural communities to share information and knowledge on key themes such as HIV/AIDS, violence against women, and food security                                                | Support and coordination of federations of community listeners’ clubs in the rural territories                | Enables rural communities, especially women, to make their voices heard and benefit from the broadcasts and programs       |
| Association villageoise contre la vulnérabilité                              |                  | South Kivu                             | Development, agriculture, livestock, protection, health nutrition, education and training, entrepreneurship and micro-finance, apprenticeship in trades, and other areas of self-help | Promote the well-being of vulnerable people in villages                                                       | Men and women have joined village associations established in their villages.                                              |
| Mkaaji Mpya                                                                  | MKAAJI           | South Kivu                             | Support family fish farmers and agriculture                                                                                                                                           | Promote primary healthcare and public health                                                                  | Access to primary healthcare for mothers and children, public and community health education campaigns                     |
| Réseau Congolais des Artisans de Paix                                        | RECAP            | South Kivu                             | Peacebuilding                                                                                                                                                                         | Working on peacebuilding and on the root causes of conflict, as well as the issue of women’s leadership       | Brings together local organizations working in peacebuilding                                                               |
| Action pour la Lutte Contre l’Ignorance du SIDA                              | ALCIS            | South Kivu                             | Policies and programs designed and implemented by women sex workers                                                                                                                   | To promote health and human rights                                                                            | Cases of physical and sexual violence against sex workers are documented.                                                  |
| Action for Peace and Harmony                                                 | APC              | South Kivu, North Kivu                 | Rehabilitation of infrastructure, agriculture, and livestock; awareness of the population about peaceful cohabitation; conflict mediation                                             | Development and conflict transformation                                                                       | Encourage and support local actors in positive conflict transformation                                                     |
| Groupe d’initiative locale pour le développement intégral                    | GILDI            | South Kivu                             | Sustainable agriculture, livestock, roads, health, environment, education, and habitat                                                                                                | Promotion of the well-being of the Congolese population                                                       |                                                                                                                            |
| Comité pour l’Autopromotion à la base                                        | CAB              | South Kivu                             | Support family farming                                                                                                                                                                | Promotion of peasant agriculture, with the ambition of establishing agroecological family peasant agriculture | A rural development program that reaches 400,000 inhabitants in a region where eight out of ten households live in poverty |
| Agency for Sustainable Development Initiatives                               | AFSDI            | South Kivu                             | Membership fees, donations, and legacies                                                                                                                                              | Create a pilot village that can ensure its self-                                                              | Income from self-financing activities                                                                                      |

|                                          |        |                                        |                                                                                                                          |                                                                                                                                      |                                                                                                                                             |
|------------------------------------------|--------|----------------------------------------|--------------------------------------------------------------------------------------------------------------------------|--------------------------------------------------------------------------------------------------------------------------------------|---------------------------------------------------------------------------------------------------------------------------------------------|
|                                          |        |                                        | sufficiency with its own resources                                                                                       |                                                                                                                                      |                                                                                                                                             |
| Mulangane community Radio                |        | South Kivu                             | Capacity-building producers and awareness of the participation of all in the management                                  | Promoting the rights of forgotten women and girls                                                                                    | Obtain more votes for female candidates for heads of decentralized territorial entities                                                     |
|                                          | ADEMER | South Kivu                             | Land for the population                                                                                                  | Social support in Kahungu                                                                                                            | Social support                                                                                                                              |
| Association des Taximans Moto de l'Ituri | ATAMOI | Ituri Province                         | Facilitates travel in areas where taxis are sometimes non-existent                                                       | To reduce unemployment, create a mutual insurance company for taxi drivers, and address social issues such as illness, death, etc.   | Security in the form of taxi drivers asking for the identity, origin, and destination of their customers before transporting them           |
| Agricultures Committee                   |        | Ituri Province                         | Land-use plans for village territories or simple natural resource management plans                                       | Involve all members of the village community and allow them to engage in decisions on land-use plans, water, and wildlife resources. | Supervision of agricultural practices and sectors. Collective decisions are leading to better governance.                                   |
| Union of Congolese Patriots              | UPC    | Ituri Province                         | A political and militia group in Ituri, formed towards the end of the Second Congo War                                   | IDP learning new skills to prepare them for a life of self-sufficiency                                                               | Community members have acquired skills like soap-making and tailoring.                                                                      |
| Congolese International Congress         | CIC    | Ituri Province                         | Health and environment, human rights, community development, culture, and art                                            | Preparing a new generation of country managers who are much more responsible and capable of restoring the tarnished image of the DRC | Training young people in entrepreneurial spirit and culture, design and develop bankable projects to address youth unemployment and poverty |
| Action citoyenne contre l'impunité       | ACCI   | Ituri Province                         | Interested in the environment, transparency, and the rights of local communities                                         | Human rights                                                                                                                         | Using national, regional, and international laws as a basis for claim                                                                       |
| Association des Taxis-Motos à Bunia      | ATMB   | Ituri Province                         | Motorcycle taxis offer advantages compared to classic taxis.                                                             | Can help find the criminals who roam day and night through the city of Bunia                                                         | Speed and respect for the customer's destination                                                                                            |
| Land and Physical Environment            |        |                                        |                                                                                                                          |                                                                                                                                      |                                                                                                                                             |
| Football pitches                         |        | South Kivu, North Kivu, Ituri Province | Accessible to many footballers<br>Engaging football sessions                                                             | Sense of belonging                                                                                                                   | Strengthens communities, reduces loneliness, ethnic harmony, community pride, improvement in social cohesion                                |
| Youth spaces or youth clubs              |        | South Kivu                             | Conduct educational talks around gender issues, hygiene, and awareness-raising                                           | Become involved in local development and fight poverty in the community                                                              | Strengthened traditional behavior and customs in the village                                                                                |
| Small and big markets                    |        | South Kivu, North Kivu, Ituri Province | Guides implementation and works on the root causes of market failures                                                    | Promoting sustainable and inclusive development by empowering entrepreneurs                                                          | People's income is increased, improved business practices                                                                                   |
| Churches                                 |        | South Kivu, North Kivu, Ituri Province | Lay activism, with many lay men and women bearing witness to their faith in the political, economic, and cultural fields | Compensating for the lack of public services through its network of hospitals, social centers, and renowned schools                  | Appeals for peace in eastern Congo                                                                                                          |
| Radio Bubusa                             |        | South Kivu                             | Capacity building for women as a strategy to tackle rural poverty in Walungu                                             | Ensure that women have access to information, training, and communication                                                            | The issue of profound poverty that characterizes the area is addressed.                                                                     |
| Guest houses and hotels                  |        | South Kivu, North Kivu, Ituri Province | A selection of guest houses and hotels                                                                                   | Tourism                                                                                                                              | Possibility of accommodation                                                                                                                |

|                                                                          |            |                                        |                                                                                                                                                      |                                                                                                                                                                          |                                                                                                                                                                                                                              |
|--------------------------------------------------------------------------|------------|----------------------------------------|------------------------------------------------------------------------------------------------------------------------------------------------------|--------------------------------------------------------------------------------------------------------------------------------------------------------------------------|------------------------------------------------------------------------------------------------------------------------------------------------------------------------------------------------------------------------------|
| available for accommodation                                              |            |                                        |                                                                                                                                                      |                                                                                                                                                                          |                                                                                                                                                                                                                              |
| Beaches                                                                  |            | South Kivu, North Kivu                 | A picturesque and very charming setting                                                                                                              | Tourism                                                                                                                                                                  | Volcanic islands surrounded by beautiful beaches, terraced hills, and fishing villages                                                                                                                                       |
| Queen Elizabeth house                                                    |            | South Kivu                             | Tourist site                                                                                                                                         |                                                                                                                                                                          | Tourist site                                                                                                                                                                                                                 |
| Center for victims of armed conflicts                                    | CIVIC      | South Kivu                             | Strengthen the capacity of armed actors and relevant institutions during conflict resolution                                                         | Support communities affected by conflict                                                                                                                                 | Prevent and respond to civilian harm                                                                                                                                                                                         |
| Sports clubs for basketball, games rooms for billiards and kicker        |            | South Kivu                             | Strengthen communities                                                                                                                               | Sport activities                                                                                                                                                         | Reduce loneliness<br>Improve social cohesion                                                                                                                                                                                 |
| Action Sociale CHECHE                                                    | CHECHE     | South Kivu                             | Training the youth who have left school for employment                                                                                               | Fight against poverty, unemployment, and delinquency                                                                                                                     | Self-financing activities for young people and general services for the proper functioning of the whole constitute reliable aid to the economic development of families and religious communities.                           |
| Publishing houses                                                        |            | North Kivu                             | Print media are almost non-existent outside the capital city.                                                                                        | Free access to information in the public interest                                                                                                                        | Editorial independence of public broadcasting                                                                                                                                                                                |
| Photo studios                                                            |            | North Kivu                             | Family photo albums, social identities, and cultural values                                                                                          | To preserve and expose the work of Congolese photographers and help define the country in terms other than victimization and conflict                                    | Possibility to archive and preserve the country's history                                                                                                                                                                    |
| Réseau communautaire pour la Protection des enfants                      | RECOPE     | South Kivu                             | Training sessions on the techniques of community action favorable to the prevention of/response to violations of the rights of children              | Protection of children against violence                                                                                                                                  | Members of the organization are equipped with the techniques of community action favorable to the prevention of/response to violations of the rights of children and the promotion of peaceful coexistence and non-violence. |
| Local Institutions                                                       |            |                                        |                                                                                                                                                      |                                                                                                                                                                          |                                                                                                                                                                                                                              |
| Primary and secondary schools                                            |            | South Kivu, North Kivu, Ituri Province | Elementary school is provided.                                                                                                                       |                                                                                                                                                                          | A certificate of primary and secondary school is awarded.                                                                                                                                                                    |
| Centre de Recherche en Science Naturelles                                | CRSN/Lwiro | South Kivu                             | Offers studies in biology, geophysics, and the environment                                                                                           | The library of the Natural Sciences Research Center of Lwiro                                                                                                             | Provides samples from the region's unique biodiversity.                                                                                                                                                                      |
| Agence d'achat des Performances                                          | AAP Santé  | South Kivu                             | To obtain funding from institutional donors and attempt to attain access to human resources                                                          | To promote the social contract between the state and communities by ensuring the access of citizens to quality social services through the promotion of the PBF approach | Negotiate and sign the devolution of service agreement public with the Ministry of Health or other donors                                                                                                                    |
| Consortium for Improving Agriculture-based Livelihoods in Central Africa | CIALCA     | South Kivu                             | Improving agriculture-based livelihoods through sustainably increased system productivity to enhance income, nutrition security, and the environment | To accelerate the impact of agricultural research for development                                                                                                        | Conducting agricultural research for development in Rwanda, Burundi, and eastern Democratic Republic of Congo                                                                                                                |

|                                                                                         |                               |                                        |                                                                                                                         |                                                                                                                                        |                                                                                                                                                                                                                       |
|-----------------------------------------------------------------------------------------|-------------------------------|----------------------------------------|-------------------------------------------------------------------------------------------------------------------------|----------------------------------------------------------------------------------------------------------------------------------------|-----------------------------------------------------------------------------------------------------------------------------------------------------------------------------------------------------------------------|
| Association pour le Développement intégré au Kivu                                       | ADI-Kivu                      | South Kivu                             | Farmer–breeders participating in research to address food security issues                                               | Organizes a knowledge exchange session between farmers, breeders, technicians, and agricultural engineers on crop and livestock issues | Family farming is carried out and there is food security.                                                                                                                                                             |
| Solidarité Féminine contre la Pauvreté                                                  | SOLIFEM                       | South Kivu                             | Development of income-generating activities, especially in the agriculture, livestock, and microcredit sectors.         | Female solidarity against poverty                                                                                                      | Socio-economic empowerment for marginalized groups                                                                                                                                                                    |
| Coopératives d'Epargnes et de Crédit                                                    | COOPEC                        | North Kivu, South Kivu                 | Microcredits are granted to members by the cooperative.                                                                 | Social and economic advancement of its members by collecting their savings and granting loans to them.                                 | Entrepreneurship with cooperatives as a new paradigm of struggle against poverty<br>Cooperatives as good opportunities to undertake some business                                                                     |
| Institut Supérieur de Développement Rural                                               | ISDR                          | South Kivu                             | Socio-economics and planning of rural development or environmentally friendly management of natural resources           | Organizing quality education, conducting scientific research, and supporting rural development actions.                                | A degree in rural development                                                                                                                                                                                         |
| Institut Supérieur pour la Promotion de la Paix, du Développement et de l'Environnement | ISPDE                         | South Kivu                             | To learn how to prevent and positively manage conflicts                                                                 | Conflict prevention and resolution and promotion of scientific research                                                                | Graduates receive on-the-job market training in the field of business management.                                                                                                                                     |
| Institut Supérieur des Techniques de Développement                                      | ISTD                          | South Kivu                             | Offers higher education in community development, the environment, and sustainable development                          |                                                                                                                                        |                                                                                                                                                                                                                       |
| Mamas for Africa                                                                        |                               | South Kivu                             | Multidisciplinary teams going from village to village every day offer shelter to girls and women in Maison de la Femme. | Mediation for women and female victims of sexual or gender-based abuse                                                                 | Consolidated presence in rural areas, where the need is greatest                                                                                                                                                      |
| Women for women                                                                         |                               | South Kivu                             | Offers women a constructive, dignified way to regain control of their lives                                             | Education, professional preparation, and agro-pastoral                                                                                 | Increased assets for women, engagement with entrepreneurial work, and net earnings; mental health and household diet diversity; and self-confidence and participation in household decision-making and social support |
| Institut Supérieur Pédagogique                                                          | ISP                           | South Kivu, North Kivu, Ituri Province | Administrative and computer sciences<br>Engineering arts and humanities<br>Exact sciences                               | Education leading to an advanced diploma                                                                                               | Positive and effective contribution to the socio-economic development of the country                                                                                                                                  |
| Institut Supérieur de Technique Médical                                                 | ISTM                          | South Kivu                             | Education is offered at higher education institutes for applied medical sciences.                                       | Education leading to an advanced diploma                                                                                               | Graduates could serve the province as teachers and civil society leaders.                                                                                                                                             |
| Institut Supérieur des Etudes Agronomiques et Vétérinaires                              | ISEAV                         | South Kivu                             | Allow students to specialize in agroforestry, agribusiness, and agricultural entrepreneurship                           | Education leading to an advanced diploma                                                                                               | Graduates could serve the province as teachers, administrators, and civil society leaders.                                                                                                                            |
| Universities                                                                            | UOB, UEA, UCB, UNP, UNIC, and | South Kivu, North Kivu                 | Capacity to deliver higher education degrees in the                                                                     | The ultimate goal is to train students to provide                                                                                      | Increasing access to higher education, potential to improve and save lives                                                                                                                                            |

|                                                                     | ULPGL,<br>UNIGOM   |                                           | country, higher estimated<br>number of students                                                                                    | answers to real-life<br>problems.                                                                                                                   |                                                                                                                                                                                                                                                                                                                                               |
|---------------------------------------------------------------------|--------------------|-------------------------------------------|------------------------------------------------------------------------------------------------------------------------------------|-----------------------------------------------------------------------------------------------------------------------------------------------------|-----------------------------------------------------------------------------------------------------------------------------------------------------------------------------------------------------------------------------------------------------------------------------------------------------------------------------------------------|
| Brasseries, Limonaderies et<br>Malteries                            | BRALIMA            | South Kivu                                | Production and<br>marketing of beer and<br>soft drinks                                                                             | To achieve positive social,<br>environmental, and<br>economic impact on the<br>population                                                           | Developing different social<br>activities that improve the<br>social life and conditions of<br>the local population                                                                                                                                                                                                                           |
|                                                                     | PHARMAKIN<br>A     | South Kivu                                | Industrial extraction of<br>quinine from the<br>harvested bark of the<br>quinquina tree                                            | Production of affordable<br>medicines for poor people                                                                                               | Quinine output is exported<br>as an active pharmaceutical<br>ingredient (API) to<br>pharmaceutical and<br>intermediary product food<br>industries all over the<br>world.                                                                                                                                                                      |
| Office Congolais de<br>C  ntrole                                    | OCC                | South Kivu                                | Conformity assessment<br>and verification of aspects<br>of quality, quantity, and<br>price.                                        | Ensure the regularity of<br>commercial transactions<br>and safeguard the interests<br>of the various partners<br>involved in international<br>trade | A response to the need for<br>neutral and independent<br>organizations                                                                                                                                                                                                                                                                        |
| Bureau Dioc  sain des<br>  uvres M  dicales                         | BDOM               | South Kivu                                | Medical service technique                                                                                                          | Contributing to the<br>improvement of the state of<br>health of the population in<br>South Kivu                                                     |                                                                                                                                                                                                                                                                                                                                               |
| Office des routes                                                   | OR                 | South Kivu, North<br>Kivu, Ituri Province | Road infrastructure<br>works<br>quality control of<br>building materials<br>Promotion of new<br>construction technologies          | To manage the network of<br>roads of general interest                                                                                               | Development,<br>construction, and<br>modernization of<br>infrastructures                                                                                                                                                                                                                                                                      |
| Soci  t   Nationale<br>d'Assurances                                 | SONAS              | South Kivu, North<br>Kivu, Ituri Province | To stimulate capital and<br>promote savings                                                                                        | Selling insurance and<br>settling claims                                                                                                            | To finance the national<br>economy                                                                                                                                                                                                                                                                                                            |
| Soci  t   nationale de chemin<br>de fer du Congo                    | SNCC               | South Kivu, North<br>Kivu, Ituri Province | Commercial company<br>responsible for public<br>transport                                                                          | Public transport                                                                                                                                    | Railways, lakes, roads, and<br>rivers                                                                                                                                                                                                                                                                                                         |
| Children's Village Bukavu                                           | SOS                | South Kivu                                | Social center, small loans,<br>food packages and<br>medicine, kindergarten<br>and schooling for children                           | To strengthen vulnerable<br>families in Bukavu and<br>help them to become self-<br>sufficient                                                       | Strengthen vulnerable<br>families and help them to<br>become self-sufficient,,<br>enhance the parent's or<br>caretakers' chance of<br>finding a job, enable<br>parents to attend their jobs<br>knowing that their children<br>are well cared for, and help<br>children and their families<br>to achieve a brighter future<br>in the long-term |
| Actions Collectives pour le<br>D  veloppement Social                | ACODES             | North Kivu                                | Works to improve the<br>socio-economic, health,<br>and environmental living<br>conditions of<br>disadvantaged local<br>populations | To encourage<br>environmentally friendly<br>values and behaviors and<br>to teach sustainable fishing<br>practices                                   | Promotion of human<br>rights, gender equality,<br>economic empowerment,<br>education, child protection,<br>environmental protection,<br>and habitat and land<br>protection                                                                                                                                                                    |
| Microfinance Institutions<br>and Savings and credit<br>cooperatives | MFIs and<br>SACCOS | North Kivu                                | Service a million accounts<br>in the province                                                                                      | Financial inclusion by<br>helping the poorest<br>populations to obtain<br>access to basic financial<br>services, also in rural areas.               | Local economic growth,<br>provision of mid- to long-<br>term financing to financial<br>institutions                                                                                                                                                                                                                                           |
| City Hall                                                           |                    | South Kivu, North<br>Kivu, Ituri Province | Each town hall brings<br>together municipalities.                                                                                  | Management of a city                                                                                                                                | Each city is headed by a<br>mayor.                                                                                                                                                                                                                                                                                                            |
| Hospitals                                                           |                    | South Kivu, North<br>Kivu, Ituri Province | Over 401 hospitals and<br>clinics in the country                                                                                   | To organize more<br>specialized treatment                                                                                                           | Early childhood<br>vaccinations, maternal<br>care, as well as treatment<br>of chronic diseases                                                                                                                                                                                                                                                |
| Individuals                                                         |                    |                                           |                                                                                                                                    |                                                                                                                                                     |                                                                                                                                                                                                                                                                                                                                               |

|                               |       |                                        |                                                                                                                                                                             |                                                                                                                                                |                                                                                                                                                         |
|-------------------------------|-------|----------------------------------------|-----------------------------------------------------------------------------------------------------------------------------------------------------------------------------|------------------------------------------------------------------------------------------------------------------------------------------------|---------------------------------------------------------------------------------------------------------------------------------------------------------|
| Elected members of parliament | MP    | South Kivu, North Kivu, Ituri Province | List of candidates from which voters can select their favorite                                                                                                              | To ensure the proper functioning of new institutions                                                                                           | Elected through a proportional electoral system for five-year terms                                                                                     |
| Nurses and midwives           |       | South Kivu, North Kivu, Ituri Province | Ability to help vulnerable populations                                                                                                                                      | Evidence-based healthcare to fit local conditions and necessities                                                                              | Serve the country as healthcare professionals                                                                                                           |
| Medical doctors               | MD    | South Kivu, North Kivu, Ituri Province | Ability to help vulnerable populations                                                                                                                                      | Evidence-based healthcare to fit local conditions and necessities                                                                              | Serve the country as healthcare professionals                                                                                                           |
| Engineers                     |       | South Kivu, North Kivu, Ituri Province | They hold a degree from a faculty of law after 5 years of study and have jurisdiction all over the country                                                                  |                                                                                                                                                | Involved in architectural, engineering, and other technical activities                                                                                  |
| Lawyers                       |       | South Kivu, North Kivu, Ituri Province | Offers legal support in different aspects, including commerce, mining, energy, food, agro-business industry, safety and security, and environmental issues and biodiversity | Promotion of justice and equal opportunities for all citizens, as well as defense of human rights                                              | Meet the needs of the civilians who require legal assistance                                                                                            |
| Priests                       |       | South Kivu, North Kivu, Ituri Province | Diocesan priests ministering in parishes and dioceses                                                                                                                       | Lay activism and its widespread presence in society and in the media                                                                           | The lack of public services is compensated for through the network managed by priests.                                                                  |
| Master tailors                |       | South Kivu, North Kivu, Ituri Province | Blouses, dresses, shirts, and headscarves come in every color, such as maraschino cherry.                                                                                   | To provide the population with training leading to professional certification and income-generating activity.                                  | Population able to start their own businesses and have income                                                                                           |
| Traditional chiefs            |       | South Kivu, North Kivu, Ituri Province | Traditional chiefs are co-opted by the provincial deputies on the basis of one chief for each territory.                                                                    | Educate traditional chiefs on their role in the fight against impunity for sexual violence                                                     | Trained in human rights and well-informed about counseling services for victims of sexual violence.                                                     |
| Traditional healers           |       | South Kivu, North Kivu, Ituri Province | Combine modern medicine with traditional healing                                                                                                                            | Offering conventional and herbal treatments                                                                                                    | Many of the herbs used are gathered by local indigenous groups, who historically lived in forests and have vast knowledge about local plants and herbs. |
| Musicians                     |       | South Kivu, North Kivu, Ituri Province | People have long loved, cried, lived, and danced to the rhythms of Congolese beats.                                                                                         | To explore possible linkages with civil society and established media outlets, to offer a model of leadership by using music as a public voice | Congolese music distracts and entertains the hapless masses.                                                                                            |
| Teachers                      |       | South Kivu, North Kivu, Ituri Province | Context, teacher participation, and supportive community building                                                                                                           | To improve the low level of learning standards                                                                                                 | More children who start primary school complete the basic education cycle                                                                               |
| Community leaders             |       | South Kivu, North Kivu, Ituri Province | Social cohesion and peaceful coexistence between communities                                                                                                                | Promoting peaceful coexistence among all communities                                                                                           | Community leaders signed a joint statement that was used to further disseminate their message.                                                          |
| Artisanal mining              | Mines | South Kivu, North Kivu, Ituri Province | Driver of development in communities where there are often few other opportunities for generating income                                                                    | Contributes to many of the Sustainable Development Goals                                                                                       | With comprehensive formalization, the global community can mitigate negative impacts.                                                                   |
| Plantations IRABATA           |       | South Kivu                             | Approximately 43% of the plantation area was unexploited.                                                                                                                   | Exploiting the tea plant, Cinchona, afforestation                                                                                              | Tea factory, Cinchona, afforestation                                                                                                                    |



|                                               |                                        |                                                                                                                                                                                                                                                   |                                                                                                                                                                              |                                                                                                                                        |
|-----------------------------------------------|----------------------------------------|---------------------------------------------------------------------------------------------------------------------------------------------------------------------------------------------------------------------------------------------------|------------------------------------------------------------------------------------------------------------------------------------------------------------------------------|----------------------------------------------------------------------------------------------------------------------------------------|
| Owner of a health center                      | North Kivu                             | Service delivery, access to essential medicines, and health information systems                                                                                                                                                                   | Access to basic healthcare services                                                                                                                                          | Improved access to healthcare in terms of volume and quality for the local community                                                   |
| Plantation GOMBO                              | South Kivu                             | Okra has 25 workers distributed in different areas, and 20 people are working in the tea factory.                                                                                                                                                 | Food security—fight against erosion, agroforestry, the production of fertilizers by composting plant waste and animal excrement, marsh drainage, cultivation on ridges       | Production from the Okra plantation is oriented towards individual consumption.                                                        |
| Community workers                             | South Kivu, North Kivu, Ituri Province | Plumbers, masons, carpenters, traders                                                                                                                                                                                                             |                                                                                                                                                                              |                                                                                                                                        |
| Colonels                                      | Ituri Province                         | Campaigning, sharing intelligence with the army, and maintaining a sufficient presence                                                                                                                                                            | Maintaining civil order during tense times                                                                                                                                   | Fewer kidnappings, fewer civilians are killed, and fewer attacks on civilians                                                          |
| Culture, History, and Stories                 |                                        |                                                                                                                                                                                                                                                   |                                                                                                                                                                              |                                                                                                                                        |
| Cultural center of Goma                       | North Kivu                             | Training programs in painting, sculpture, carving, architecture, and ceramics, as well as traditional music and drama.                                                                                                                            | Promotion of cultural life and arts                                                                                                                                          | Artists write poetry, plays, and novels in local languages.                                                                            |
| Cultural center of Ituri                      | Ituri Province                         | Organizing festivals of local artists, film projections, etc.                                                                                                                                                                                     | Promotion of cultural life and arts                                                                                                                                          |                                                                                                                                        |
| Cultural center of Bukavu                     | South Kivu                             | Organizing festivals of local artists, film projections, etc.                                                                                                                                                                                     | Conflict management and the promotion of peace                                                                                                                               |                                                                                                                                        |
| Movie room                                    | South Kivu, North Kivu, Ituri Province | Film projections                                                                                                                                                                                                                                  | To channel people's energy into arts, not conflict                                                                                                                           | The weary victims of war have a chance, a moment, to forget their misery.                                                              |
| Local Economy and Exchange                    |                                        |                                                                                                                                                                                                                                                   |                                                                                                                                                                              |                                                                                                                                        |
| Local product from the nearest city of Bukavu | South Kivu                             | Offers green shoots of hope to local communities and facilitates greater "agri-preneurship" among local youth, thereby contributing to stabilization and economic recovery in some of the most fragile and conflict-affected areas in the country | To achieve security in sustainable food                                                                                                                                      | A local entrepreneur has employed more youths to increase the production of its cookies and biscuits.                                  |
| Breeding                                      | South Kivu, North Kivu                 | Plants, animals, fertile country with approximately 80 million hectares of arable land                                                                                                                                                            | To improve food insecurity issues in the long term                                                                                                                           | Smallholder farmers are practicing family farming market-oriented agriculture and reducing gender inequalities while empowering women. |
| Craft sector                                  | South Kivu, North Kivu                 | Basketry, sewing, carpentry, bricks, etc.                                                                                                                                                                                                         | Oversight of the development of non-agricultural activities, including crafts                                                                                                | The craft sector is expanding and well-developed.                                                                                      |
| Agriculture                                   | South Kivu, North Kivu                 | Local products such as cassava, banana, bean, coffee, and groundnut                                                                                                                                                                               | To develop the agricultural sector and strengthen its contribution to economic growth, restore the country's food security, and reduce poverty and insecurity in rural areas | Marketing of harvest products                                                                                                          |

|                                        |        |                                        |                                                                                                                                                                                           |                                                                                                     |                                                                                                                                        |
|----------------------------------------|--------|----------------------------------------|-------------------------------------------------------------------------------------------------------------------------------------------------------------------------------------------|-----------------------------------------------------------------------------------------------------|----------------------------------------------------------------------------------------------------------------------------------------|
| Livestock and agro-pastoral            |        | South Kivu, North Kivu                 | The largest livestock farming region in the country                                                                                                                                       | To contribute to the achievement of food security                                                   | Improved access to markets and value-added agricultural products                                                                       |
| Fishing and maritime traffic           |        | South Kivu, North Kivu, Ituri Province | Observation of maritime distress situations, naval exercises, war situations, locations of sinking ships and drifting vessels, and salvage of crews and passengers                        |                                                                                                     |                                                                                                                                        |
| Man Day Labor Sale                     |        | South Kivu                             | Three key sectors with a large part of the workforce: agriculture, construction, and mining                                                                                               | Promote job creation                                                                                | Transfer of labor from low-productivity sectors to productive sectors                                                                  |
| Small subsistence shops, stores        |        | South Kivu, North Kivu                 | The majority of foodstuff in the country is still purchased in the traditional system.                                                                                                    | To improve the food security of the most vulnerable populations                                     | Traditional shops maintain their prominent role, making up more than half of the market.                                               |
| Soap factories                         |        | South Kivu                             | Detergents, edible oils, margarine, and cosmetics                                                                                                                                         | To promote and transform local production into finished products for the local economy              | Local products everywhere                                                                                                              |
| Electronic repair                      |        | South Kivu                             | Pick-up and delivery service                                                                                                                                                              | Electrical repair and maintenance                                                                   | People are assisted – no need to purchase new devices                                                                                  |
| Sale of services                       |        | South Kivu, North Kivu                 | Priorities include (i) good governance and consolidating peace, (ii) macroeconomic stability and economic growth, (iii) access to social services, and (iv) promoting community dynamics. | To increase the utilization of effective services                                                   | Transport, secretariat, organizers of events                                                                                           |
| Trade and other businesses             |        | North Kivu                             | The region is home to industrial and artisanal mines extracting cobalt, gold, and diamonds, as well as a rich agricultural sector.                                                        | To improve the business climate and increase trade investment                                       | Import and export potential                                                                                                            |
| PREMIDIS SARL                          |        | North Kivu                             | Construction of schools, markets, monuments, state administrative buildings, roads, bridges, universities, etc.)                                                                          | Involved in several social actions                                                                  | Partner of the City Hall, financing the construction of the office of the urban police station and a pavilion of a Catholic university |
| Société Aurifère du Kivu et du Maniema | SAKIMA | South Kivu, North Kivu                 | Owns hydroelectric power stations and various workshops to support mining production                                                                                                      | State-owned mining company that holds interests in various gold and tin mines in the eastern Congo  |                                                                                                                                        |
| Nyiragongo Ciment                      |        | North Kivu                             | Cement production                                                                                                                                                                         | Plant-based cement production                                                                       | Produce quality cement                                                                                                                 |
| Farms                                  |        | North Kivu                             | About 70% of the employed population is engaged in agriculture, mostly for subsistence.                                                                                                   | To promote inclusive economic growth, reduce poverty, and enhance food security                     | Food security of vulnerable households, durable peace, and improved nutritional uptake activities                                      |
| Artisanal mining                       |        | South Kivu, North Kivu                 | Mainly for gold, cassiterite, coltan, diamonds, tourmaline, pyrochlore, and wolfram                                                                                                       | To comply with the requirements of transparency and traceability                                    | Agreements and sorting out of differences among all stakeholders                                                                       |
| Sale of market garden products         |        | South Kivu, North Kivu                 | Favorable pedoclimatic conditions for different types of crops, such as market gardening, which                                                                                           | Characterization of market gardening systems and assessment of existing systems and perspectives to | Growing market gardening in the agricultural production system of the province                                                         |

|                         |                        |                                                                                                   |                                                                                   |                                                                                           |
|-------------------------|------------------------|---------------------------------------------------------------------------------------------------|-----------------------------------------------------------------------------------|-------------------------------------------------------------------------------------------|
|                         |                        | is one of the evolving agricultural sectors within the province.                                  | enable a steady transition to integrated, sustainable, and resilient crop systems |                                                                                           |
| Travel agents           | North Kivu, South Kivu | The Congo River, gorilla tours, the Congo Rainforest, and seeing the animals, tribes, and culture | To provide real, guided, safe, comfortable vacations in the Congo.                | Tourism                                                                                   |
| Bakeries                | South Kivu, North Kivu | A good choice and sandwiches that are always fresh                                                | To produce flour-based products that meet the expectations of the local consumers | They sell bread, several kinds of pastries, and cakes.                                    |
| Parking for motorcycles | Ituri Province         | Parking areas and roads with high volumes of movement.                                            | Increase access to hard-to-reach areas                                            | Offers a mode of transportation, the possibility to wait for customers in the parking lot |
| Local markets           | Ituri Province         | Locally produced commodities are traded over short distances.                                     | To improve access to food and water                                               | People work in fields and earn a little money in trade at the local market.               |
| Food shops              | Ituri Province         | A new agriculture revival initiative to grow more food close to home.                             | Resources needed for basic healthcare and assistance                              | Improvements in food security, reduced need for nutritional support                       |
